# Supplementary material
Source: publisher figshare collection journal article supplement (https://frontiersin.figshare.com/ndownloader/files/21623412)

**File S3. Manhattan plots for select fruit-expressed genes associated with an eQTL.**

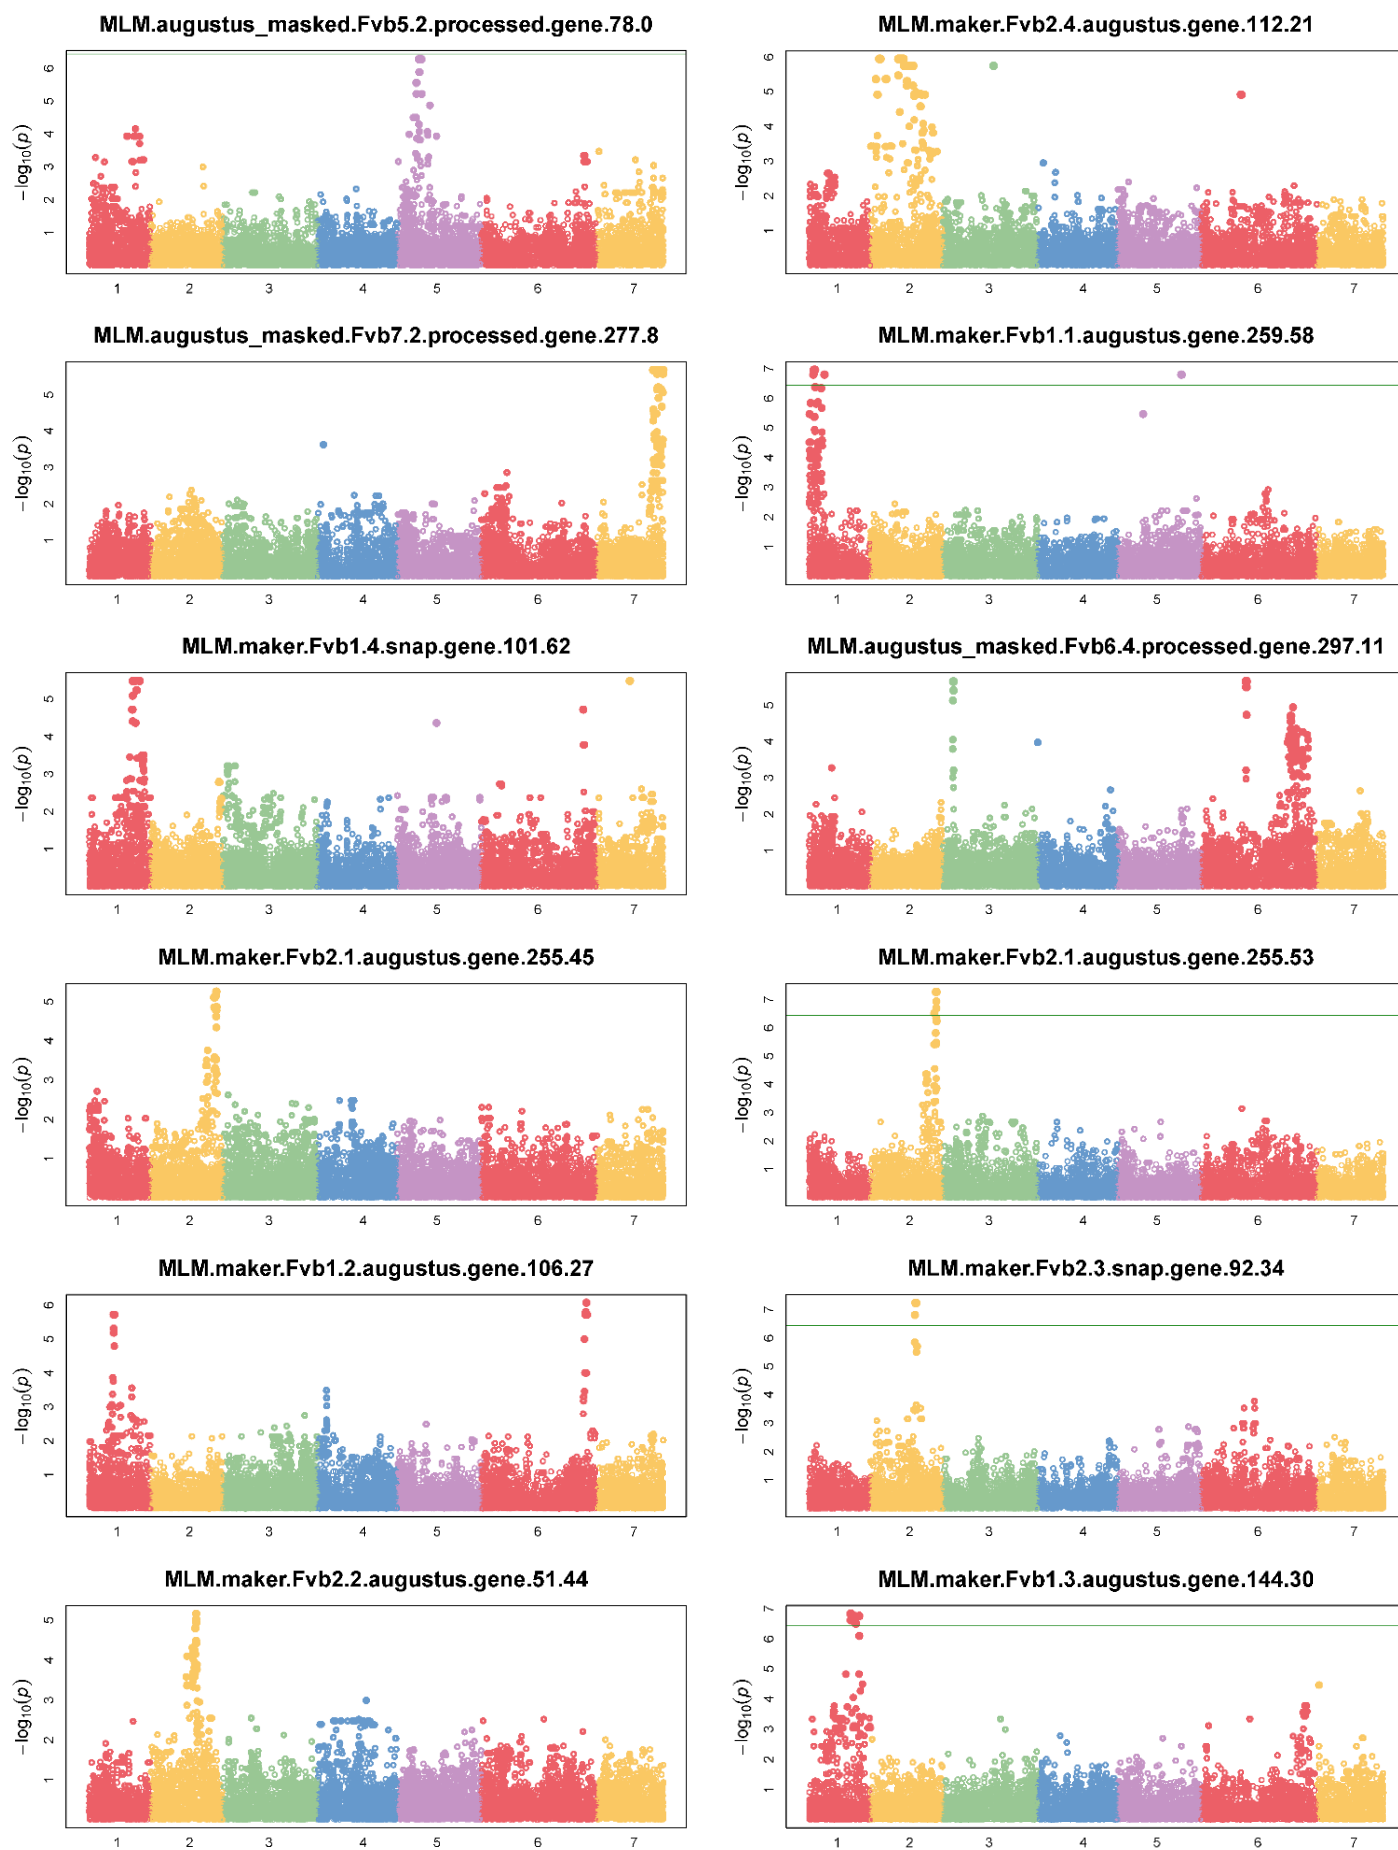

MLM.maker.Fvb2.4.snap.gene.100.35

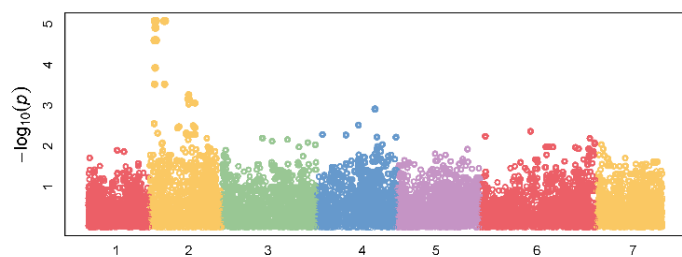

MLM.maker.Fvb4.2.augustus.gene.44.51

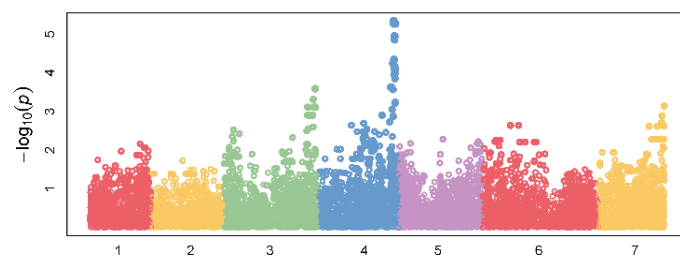

MLM.maker.Fvb2.4.snap.gene.265.134

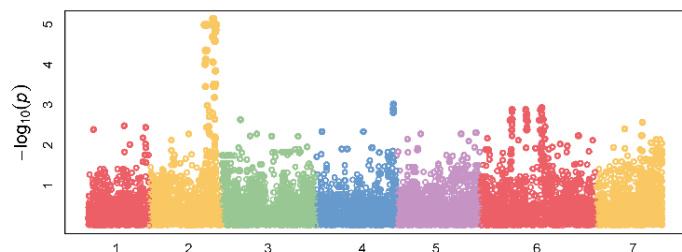

MLM.maker.Fvb4.3.augustus.gene.315.32

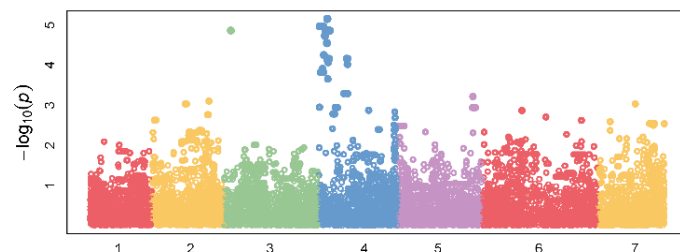

MLM.maker.Fvb3.3.augustus.gene.292.59

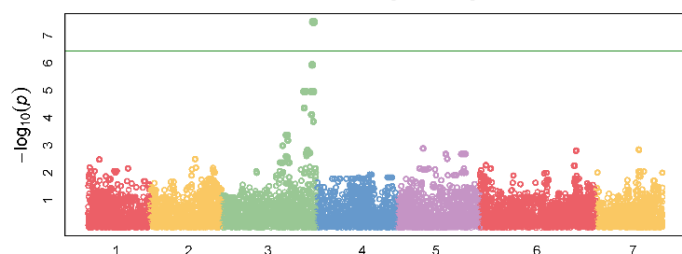

MLM.maker.Fvb4.3.snap.gene.46.51

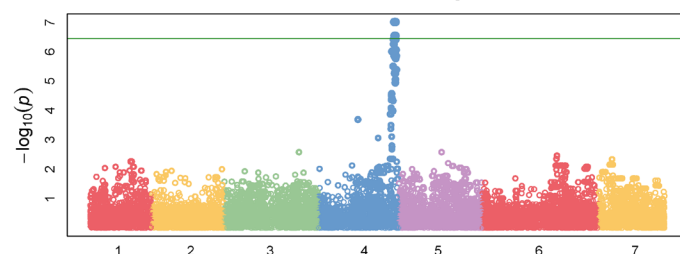

MLM.maker.Fvb4.1.augustus.gene.141.33

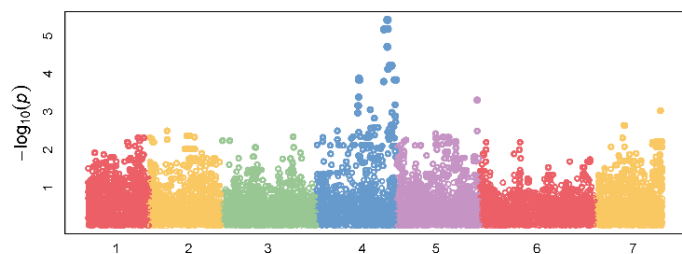

MLM.maker.Fvb5.1.augustus.gene.7.57

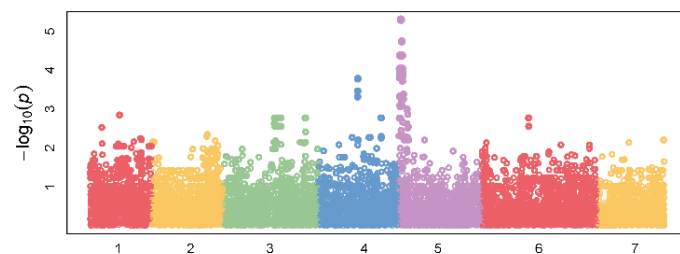

MLM.maker.Fvb4.1.augustus.gene.152.23

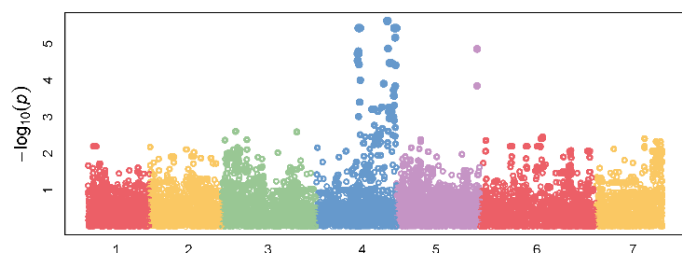

MLM.maker.Fvb5.1.snap.gene.145.25

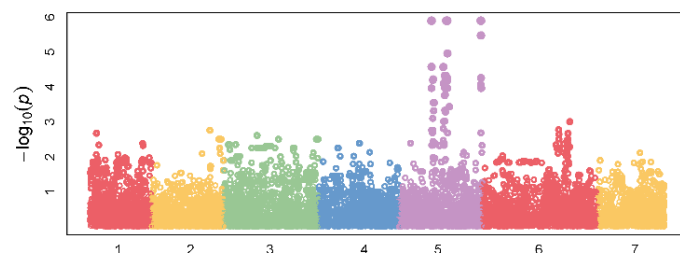

MLM.maker.Fvb4.1.snap.gene.183.52

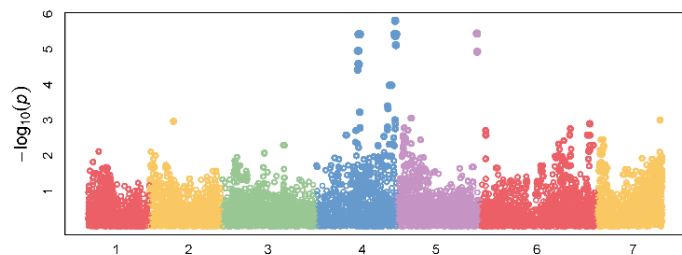

MLM.maker.Fvb5.1.snap.gene.288.58

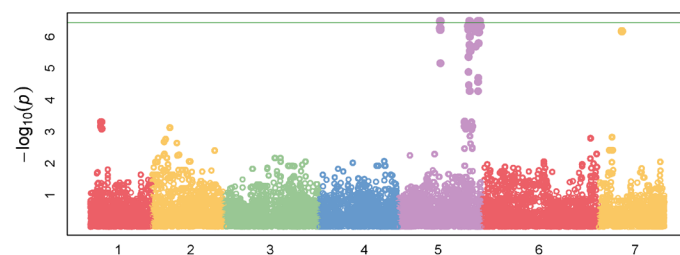

MLM.maker.Fvb5.2.augustus.gene.22.44

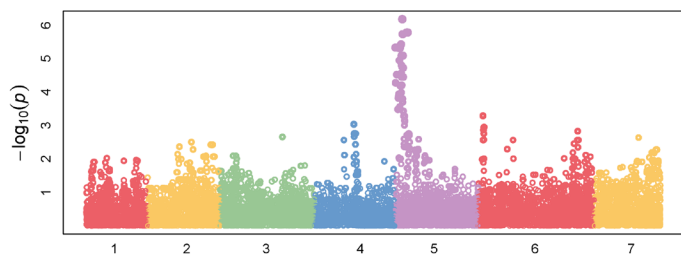

MLM.maker.Fvb6.3.augustus.gene.80.43

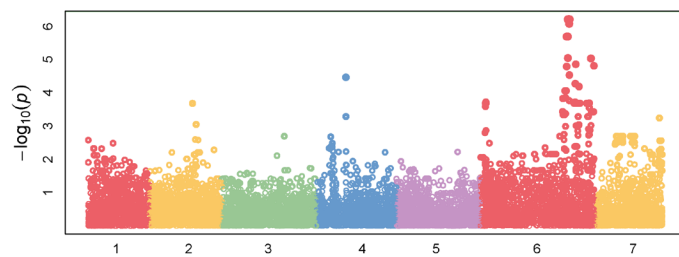

MLM.maker.Fvb5.2.augustus.gene.245.39

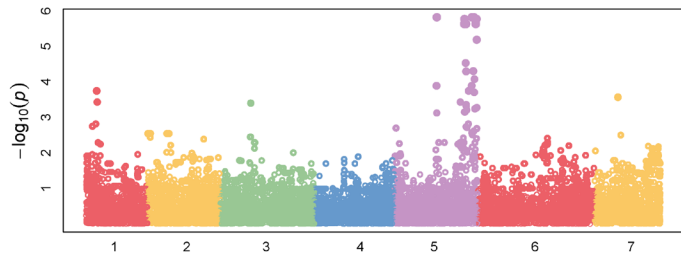

MLM.maker.Fvb6.3.augustus.gene.273.47

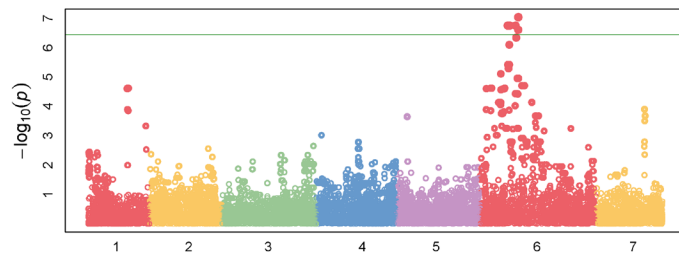

MLM.maker.Fvb5.2.snap.gene.76.47

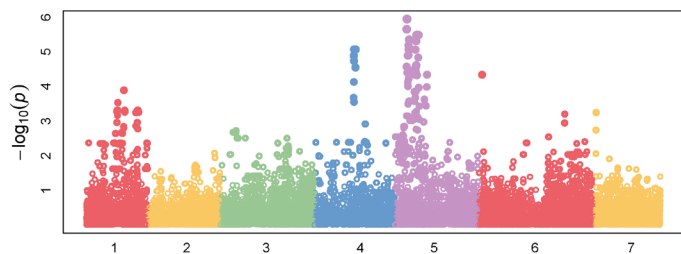

MLM.maker.Fvb6.3.augustus.gene.285.35

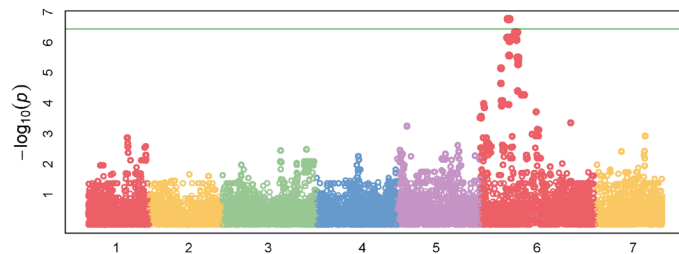

MLM.maker.Fvb6.1.augustus.gene.164.26

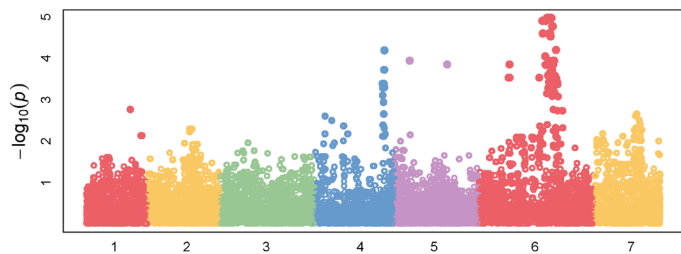

MLM.maker.Fvb6.3.augustus.gene.389.35

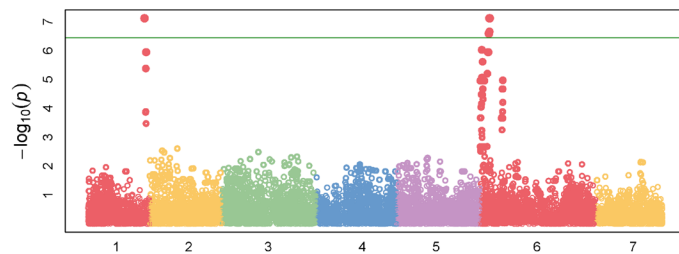

MLM.maker.Fvb6.2.augustus.gene.209.38

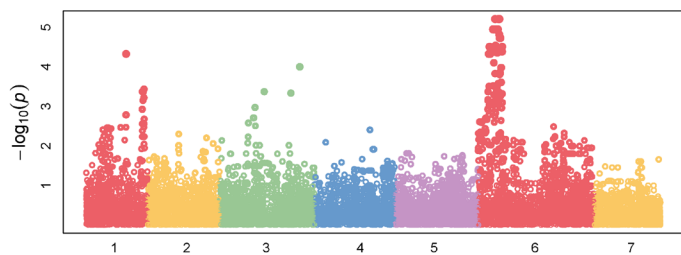

MLM.maker.Fvb6.4.augustus.gene.13.60

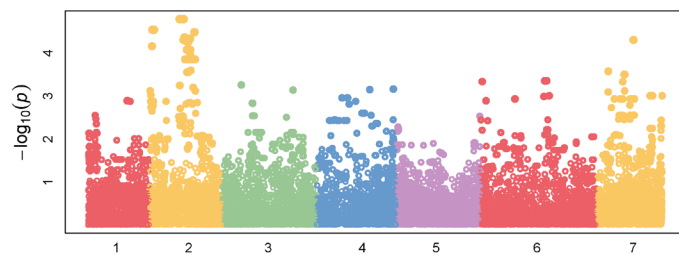

MLM.maker.Fvb6.2.augustus.gene.256.63

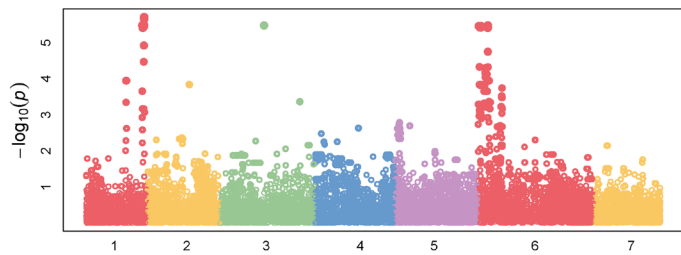

MLM.maker.Fvb6.4.augustus.gene.306.55

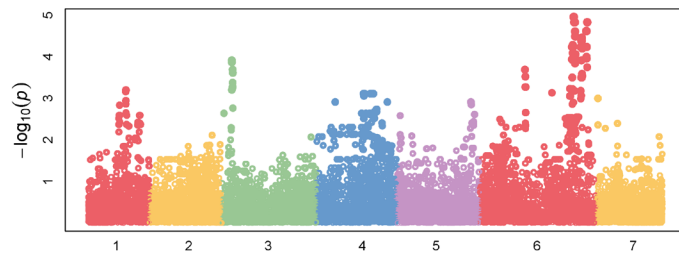

MLM.maker.Fvb7.1.augustus.gene.162.30

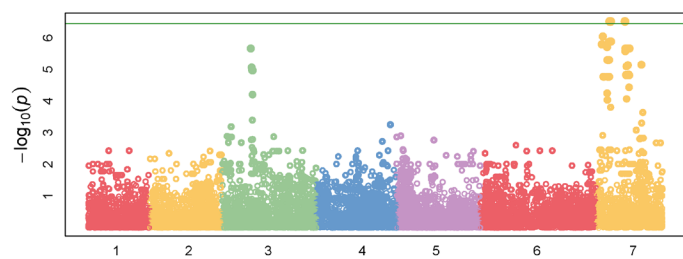

.maker.Fvb5.2.augustus.gene.33.51

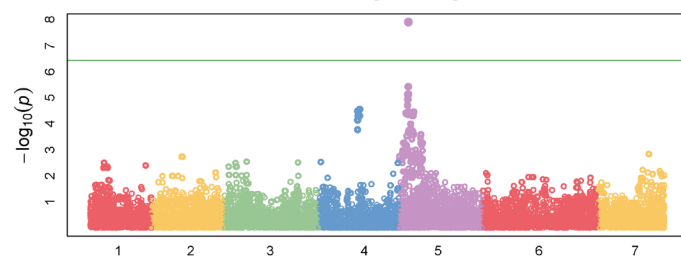

MLM.maker.Fvb7.1.augustus.gene.290.59

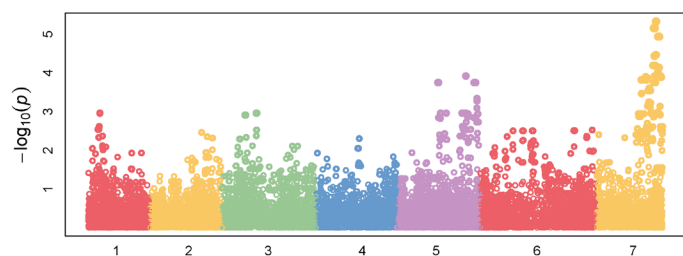

MLM.maker.Fvb3.3.snap.gene.281.43

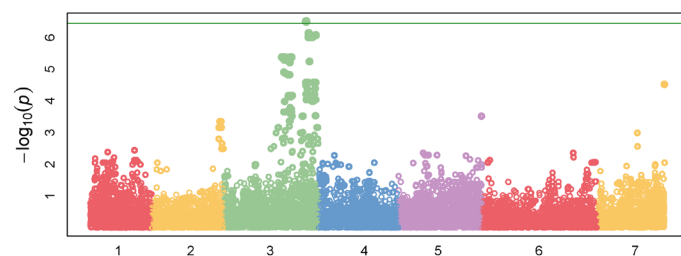

MLM.maker.Fvb7.2.augustus.gene.182.44

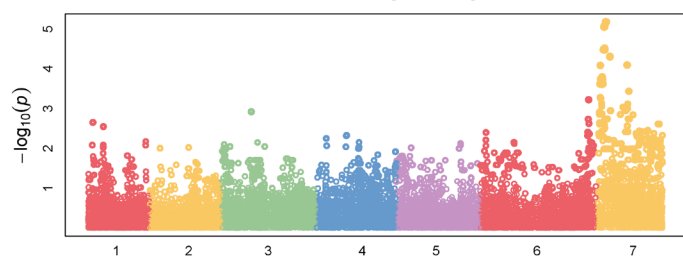

MLM.maker.Fvb5.2.augustus.gene.198.29

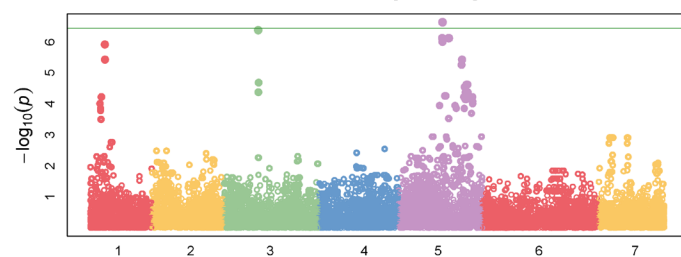

MLM.maker.Fvb7.2.augustus.gene.207.46

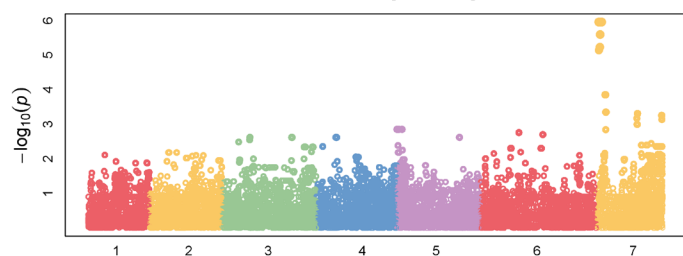

MLM.maker.Fvb7.2.augustus.gene.257.57

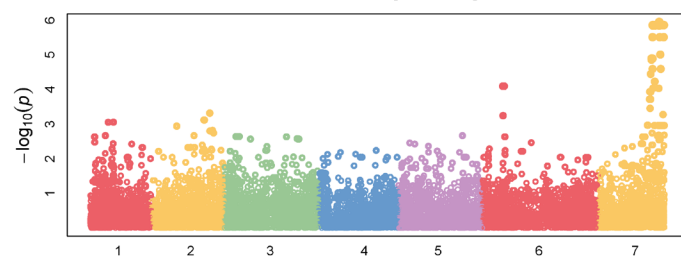

.maker.Fvb4.1.augustus.gene.141.33\_1

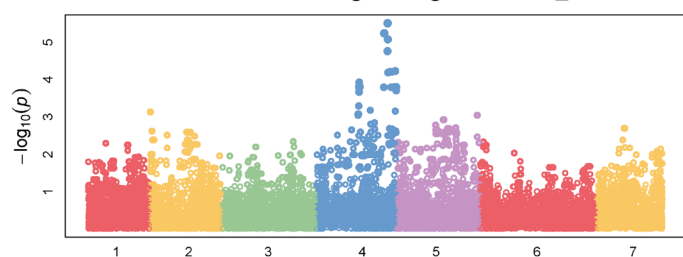

MLM.maker.Fvb7.3.augustus.gene.14.53

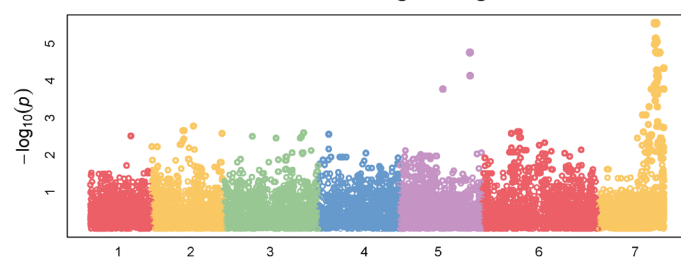

.maker.Fvb4.1.augustus.gene.196.31

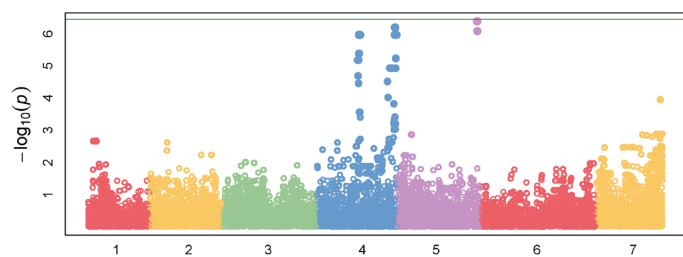

MLM.snap\_masked.Fvb2.3.processed.gene.49.22

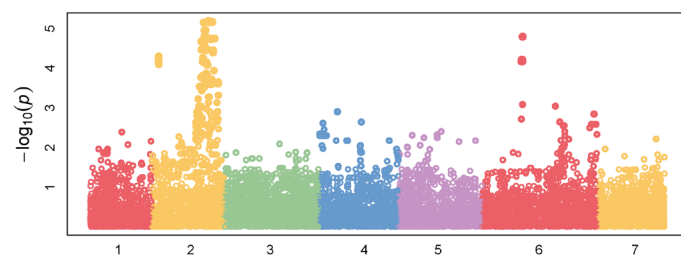

MLM.snap\_masked.Fvb6.4.processed.gene.308.25

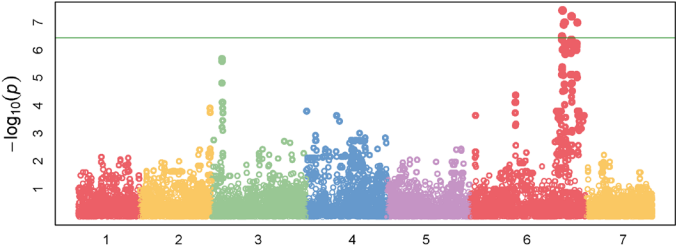

MLM.snap\_masked.Fvb7.4.processed.gene.40.42

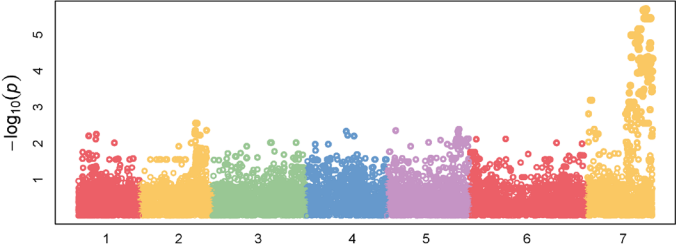

Supplement: Supplementary file [file 21623412]
